# Supplementary material for: Evaluation of Disease Spectrum in Hospitalized Cats with Hyperlipasemia: Pancreatitis Alone Is Rare, Hyperlipasemia without Suspected Pancreatitis Is Common
Source: MDPI journal article supplement (doi:10.3390/ani14101479), 2024-05-16
Supplement: s1 [file s1]

## Supplemental data

**Figure S1:** Number of cats with different disease categories in PD (left) and NP groups (right). (PD, pancreatitis with concurrent diseases; NP, no clinical diagnosis of pancreatitis)

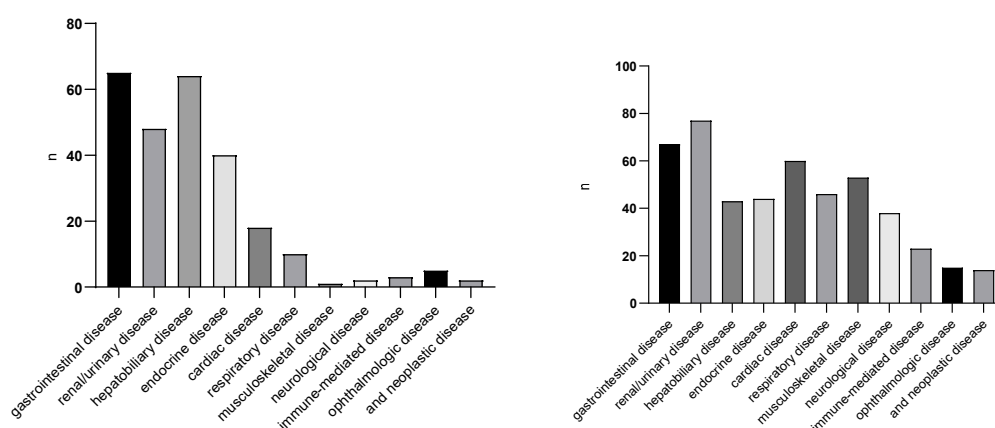

**Table S1:** Disease spectrum of 55 NP cats with an USDx (NP, no clinical diagnosis of pancreatitis; USDx, ultrasonographic diagnosis of pancreatitis; EHBDO, extrahepatic bile duct obstruction).

| Disease                                  | Number |
|------------------------------------------|--------|
| Hepatobiliary disease (incl. EHBDO n= 6) | 10     |
| Neoplasia                                | 9      |
| Chronic kidney disease                   | 8      |
| Chronic enteropathy                      | 8      |
| Diabetic ketoacidosis                    | 7      |
| Cardiac disease                          | 5      |
| Diabetes mellitus                        | 5      |
| CNS disease                              | 3      |
| Anemia                                   | 3      |
| Hepatic lipidosis                        | 2      |
| Acute kidney disease                     | 2      |
| Respiratory disease                      | 2      |
| Lower urinary tract disease              | 2      |
| Subcutaneous ureteral bypass             | 1      |
| Polyarthritis                            | 1      |
| Intestinal foreign body                  | 1      |
| Sepsis                                   | 1      |
| Anaphylaxis                              | 1      |
